# Supplementary material for: The eukaryotic tRNA-guanine transglycosylase enzyme inserts queuine into tRNAviaa sequential bi–bi mechanism
Source: Royal Society of Chemistry journal article supplement (doi:10.1039/c9cc09887a), 2020-01-01
Supplement: c9cc09887a1.pdf [file c9cc09887a1.pdf]

# The eukaryotic tRNA-guanine transglycosylase enzyme inserts queuine into tRNA *via* a sequential bi-bi mechanism

Mashaal A. Alqasem, Claire Fergus, John M. Southern, Stephen J. Connon and Vincent P. Kelly

| Table of contents              | Page |
|--------------------------------|------|
| 1. Materials and methods.....  | 1    |
| 2. Supplementary figure 1..... | 3    |

## Materials and Methods

### *Recombinant protein production*

BL21(DE3) *tgt::Km*, *E. coli* cells<sup>15a</sup> were transformed with pET15b plasmid containing codon optimised human QTRT1 cDNA to produce an N-terminal His-tag fusion or a pCDF-1b plasmid containing codon optimized human QTRT2 cDNA encoding or a C-terminal Strep-Tag<sup>®</sup>II fusion. Cells were grown in Terrific broth (4L) in a shaker-incubator at 37 °C until an OD<sub>600</sub> of 0.8, the temperature decreased to 18 °C, 0.5 mM IPTG added, the cells grown overnight at 18 °C, then collected by centrifugation (3,500 *x g*) for 10 min at 4 °C. Cell pellets were resuspended in ice-cold Binding (BD) Buffer (50 mM NaH<sub>2</sub>PO<sub>4</sub>, 300 mM NaCl, 10% glycerol, pH 7.4) with complete EDTA-free protease inhibitor cocktail (Roche) and lysed using a French-Press. Samples were centrifuged at 17,500 *x g* for 20 min, the supernatant retained and 1 µg/mL DNase I (Ambion) added. After 30 min at 4 °C, the supernatant was passed through a Nalgene 0.45 µm syringe filter. In the case of hQTRT1, 5 mM imidazole was added to the extract, which was loaded onto a pre-packed 1 mL HisTrap<sup>™</sup> HP column (GE Healthcare). The column was washed successively with BD Buffer containing 5 mM, 30 mM, 50 mM, and 80 mM imidazole before protein was eluted with 250 mM imidazole solution. hQTRT2 extract was dialysed in BD Buffer (pH 8), loaded twice through a 2 mL bed volume of Streptactin Superflow Plus resin (Qiagen, 50% *w/v* solution). The resin was washed twice with BD Buffer (30 mL) and the protein eluted in buffer containing 2.5 mM Desthiobiotin. Purified proteins were stored at -20 °C in 50% glycerol: BD buffer solution.

### *Labelling of human tyrosyl tRNA with radioactive guanine at position 34*

Human tyrosyl tRNA (htRNA<sup>Tyr</sup>) was generated by *in vitro* transcription<sup>5c</sup> and the guanine base at position 34 replaced with [8-<sup>3</sup>H] guanine (specific activity is 21.2 Ci/ mmol; Moravek Inc.) to generate htRNA<sup>Tyr</sup>-G\* (4<sup>Tyr</sup>-2<sub>34</sub>\*). The pre-labelling reactions were performed in Ribosyltransferase (RBT) Buffer (50 mM Tris-HCl pH 7.5, 20 mM NaCl, 5 mM MgCl<sub>2</sub>, 2 mM DTT) containing *in vitro* transcribed htRNA<sup>Tyr</sup> (10 µM), hQTRT1 (700 nM), hQTRT2 (700 nM), and [<sup>3</sup>H] guanine (200 nM) to a final volume of 500 µL. The reaction was incubated for 1 h at 37 °C, followed by the addition of the equal volume of (1:1) acid-phenol:chloroform (pH 4.5), the solution was mixed well and spun at 16,000 *x g* for 5 min. The upper aqueous phase was removed to a new tube and the charged tRNA precipitated by the addition of 0.1 volume of 3 M sodium acetate and 2 volumes of ethanol. The sample was incubated overnight at -20 °C, before the tRNA was pelleted at 16,000 *x g* for 20 min. The pellet was washed with ice-cold 70 % ethanol, air-dried, the 4<sup>Tyr</sup>-2<sub>34</sub>\* resuspended in nuclease-free water and the concentration measured at A<sub>260</sub> spectrophotometrically.

### *Single turn over assay*

Single turnover reactions were set up to contain the indicated combinations of hQTRT1 (10  $\mu$ M), hQTRT2 (10  $\mu$ M),  $4^{\text{tyr}}\text{-}2_{34}^*$  (10  $\mu$ M), guanine (50  $\mu$ M) or queuine (50  $\mu$ M) in RBT buffer (100  $\mu$ L final) for 30 min at 37 °C. To measure the loss of titrated guanine from  $4^{\text{tyr}}\text{-}2_{34}^*$  each reaction was quenched with 2.5 mL ice-cold 10% trichloroacetic acid (TCA, aq.) and incubated on ice for one h to precipitate the tRNA. The RNA precipitate was collected on GF/C 2.4 cm glass fiber filter disks (GE Healthcare Whatman™) using a vacuum manifold and each disk washed with 40 mL ice-cold 5% TCA (aq.) followed by 5 mL of ice-cold 95% ethanol (aq.). Filters were air-dried and placed in 10 mL of Ecoscint A (National Diagnostics) and scintillation counted.

### *Electromobility shift assay (EMSA)*

Reactions were set up to contain the indicated combinations of hQTRT1 (100 nM), hQTRT2 (100 nM), *in vitro* transcribed htRNA<sup>Tyr</sup> (10  $\mu$ M) and 9-deazguanine (25  $\mu$ M) in RBT buffer to a final volume of 20  $\mu$ L and incubated at 37 °C for an h. Samples were mixed with 5  $\mu$ L of 4X LDS loading dye (Invitrogen) and loaded on a 10% Bis-Tris gel (Invitrogen) and electrophoresed in 1x MOPS buffer (Invitrogen) at 200 volts for one h at 4 °C. The gel was stained with instant Blue Coomassie stain to visualize protein bands.

### *Kinetics assays of the human tRNA guanine transglycosylase enzyme*

To examine the reaction mechanism of the eukaryotic tRNA transglycosylase enzyme with guanine as substrate, the following components were added to reactions in the following order; RBT buffer, htRNA<sup>Tyr</sup> (1, 2, 3 and 4  $\mu$ M), 100 nM hQTRT1, 100 nM hQTRT2 and [8-<sup>3</sup>H] guanine (100, 200, 300 and 400 nM) in a final volume of 100  $\mu$ L for 2, 7 and 15 min. Reactions were terminated by the addition of ice-cold 5 % trichloroacetic acid and processed for scintillation counting as described above. To study the mechanism with queuine as substrate the guanine was substituted with [methylene-<sup>3</sup>H] queuine (7 Ci/ mmol; Moravek Inc.).

### *Microscale equilibrium binding assay*

The recombinant hQTRT1 and hQTRT2 proteins were dialysed into 20 mM Tris-HCl, 100 mM NaCl, 10 % glycerol, pH 8.0 at 4 °C. The interaction of the tRNA guanine transglycosylase enzyme with a range of [<sup>3</sup>H] Queuine or [<sup>3</sup>H]Guanine nucleobase concentrations (0.1, 0.2, 0.3, 0.4, 0.5, 0.8, 1.2, 2.0, 3.0 and 4.0  $\mu$ M) was performed for 3 h in the absence of the second substrate (i.e. tRNA). The enzyme binding reaction was prepared in RBT buffer in the following order; 100 nM hQTRT1, 100 nM hQTRT2, 10  $\mu$ M adenine (non-specific blocker), varying concentrations of [<sup>3</sup>H] Queuine or [<sup>3</sup>H] Guanine to a final volume of 100  $\mu$ L with RNase free H<sub>2</sub>O. Binding assays were also performed with [<sup>3</sup>H] Thymidine to evaluate the specificity of the binding reactions. The tRNA guanine transglycosylase enzyme was bound to 1  $\mu$ L HIS-Select® HC Nickel Magnetic Beads (Sigma;  $\geq$ 15 mg/mL binding capacity) by mixing the reaction for 20 min on a roller. The protein-bound beads were isolated by magnetic separation and mixed with 10 mL of Ecoscint and the protein-bound radioactivity determined by scintillation counting. In addition, the supernatant (free ligand) was also added to 10 mL of Ecoscint, mixed well, and radioactivity levels evaluated.

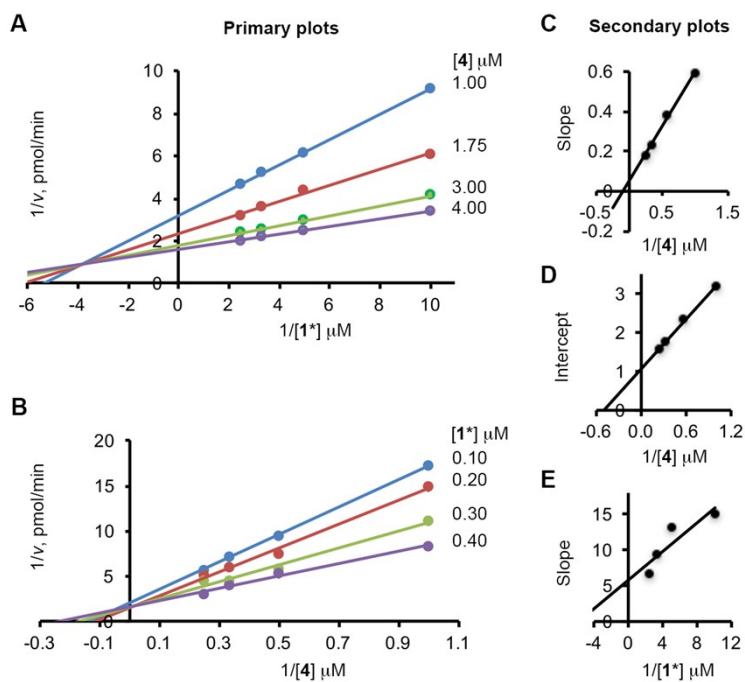

**Supplementary Fig. 1. Primary and secondary plots for queuine (1) and tRNA (4).** (A) Primary plots of  $1/v$  against  $1/[1]$  and (B) of  $1/v$  against  $1/[4]$ . Initial velocities were determined by varying the concentration of 1 (0.1-0.4  $\mu\text{M}$ ), at several fixed concentrations of 4 and by varying the concentration of 4 (1-4  $\mu\text{M}$ ) at several fixed concentrations of 1, respectively. (C) Secondary plot from A showing slope against the second substrate 4 (tRNA). (D) Intercept replot of the second substrate 4 (tRNA) from the primary plot A. (E) Secondary plot of slope against 1 from B. Data points were generated from nine independent determinations of the initial velocity data.
